# Supplementary material for: Intestinal epithelial organoids fuse to form self-organizing tubes in floating collagen gels
Source: Oxford University Press journal article supplement (doi:10.1242/dev.143933), 2017-03-14
Supplement: dev143933supp.pdf [file dev143933supp.pdf]

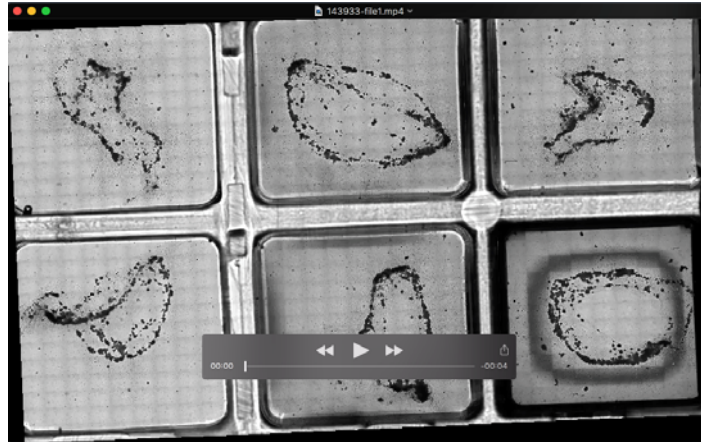

**Movie 1. Tube formation is driven by gel contraction.** 24h time-lapse movie in .mp4 format showing that collagen gels contract over time forcing organoids into alignment and close proximity.

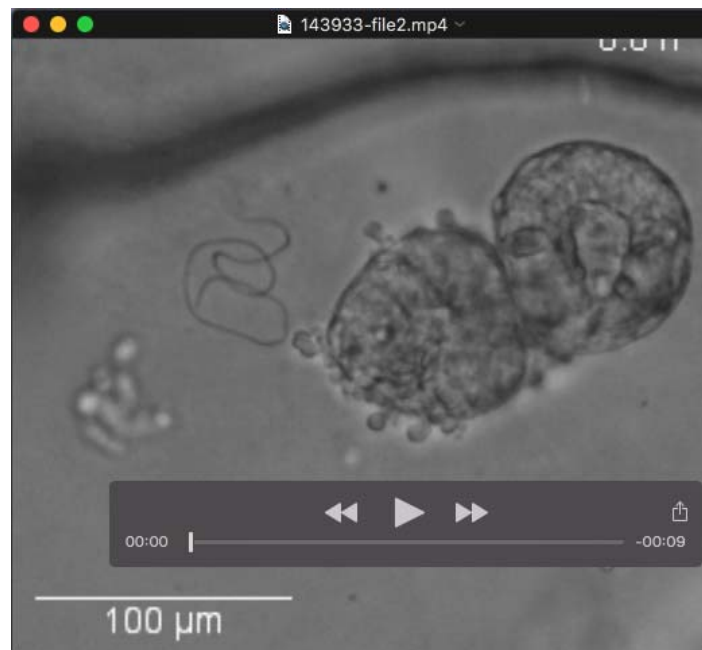

**Movie 2. Proliferating organoids in close proximity fuse.** 22h time-lapse movie in .mp4 format showing two neighbouring organoids fusing in adherent collagen gel.
